# Supplementary material for: A magnetically responsive drug-loaded nanocatalyst with cobalt-involved redox for the enhancement of tumor ferrotherapy
Source: Royal Society of Chemistry journal article supplement (doi:10.1039/d0cc03829f), 2020-01-01
Supplement: d0cc03829f1.pdf [file d0cc03829f1.pdf]

## Supporting Information

### A Magnetically Responsive Drug-loaded Nanocatalyst with Cobalt- involved Redox for the Enhancement of Tumor Ferrotherapy

Yuchu He<sup>#</sup>, Xiaowei Li<sup>#</sup>, Zhuo Li, Jiabin Bian, Xinyue Zhang, Shipan Wei, Xuwu  
Zhang\*, Dawei Gao\*

State Key Laboratory of Metastable Materials Science and Technology, Applying  
Chemistry Key Lab of Hebei Province, Hebei Key Laboratory of Heavy Metal Deep-  
remediation in Water and Resource Reuse, Yanshan University, Qinhuangdao, 066004,  
P. R. China.

\*Corresponding author: Prof. Dawei Gao, Tel: (+86)13930338376;

E-mail: [dwgao@ysu.edu.cn](mailto:dwgao@ysu.edu.cn); [xwzhang0308@163.com](mailto:xwzhang0308@163.com)

<sup>#</sup> The authors contributed equally to the work.

The acquired transmission electron microscope (TEM) images of Fe<sub>3</sub>O<sub>4</sub> nanoparticles, Co nanoparticles, Lips@Fe<sub>3</sub>O<sub>4</sub>, and Co-Lips are shown in Fig. S2-S5 (ESI). A UV-Vis spectrum indicated the presence of characteristic peaks of PTX and Fe<sub>3</sub>O<sub>4</sub> in PTX/Co-Lips@Fe<sub>3</sub>O<sub>4</sub>, which proved the successful loading of PTX and Fe<sub>3</sub>O<sub>4</sub> (Fig. S6, ESI).

We used the disappearance of colour (blue) and of the characteristic peak (665 nm) of methyl blue (MB) as an indicator of the generation of •OH. As shown in Fig. S7 (ESI) and Fig. S8 (ESI), the Fe (II) and Co (II) ions can react with H<sub>2</sub>O<sub>2</sub> to form •OH via Fenton reaction. Additionally, we used the appearance of colour (orange-red) and of the characteristic peak (508 nm) of O-phenanthroline to indicate the generation of Fe (II) ions. As shown in Fig. S9 (ESI), the Fe (II) was generated by decomposition of Fe<sub>3</sub>O<sub>4</sub> nanoparticles following addition of GSH.

## Experimental Section

**Materials.** Soya lecithin was obtained from Shanghai Advanced Vehicle Technology L.T.D. Co., Ltd (Shanghai, China). Paclitaxel was purchased from Shanghai Yuanye Biotechnology Co., Ltd (Shanghai, China). FeCl<sub>2</sub>·4H<sub>2</sub>O, FeCl<sub>3</sub>·6H<sub>2</sub>O and cholesterol were obtained from Tianjin Damao Chemical Instruments Supply Station (Tianjin, China).

**Synthesis of Co nanoparticles.** The anionic surfactant (sodium bis(2-ethylhexyl) sulfonate) was dissolved in isooctane at a concentration of 0.27 mM. Then, CoCl<sub>2</sub> and NaBH<sub>4</sub> were dissolved in this solution at a certain concentration to obtain two kinds of microemulsions. Then, the two kinds of microemulsions were mixed and the solution turned from light pink to black. The colloid is agglomerated with acetone and water as a flocculent. The excess surfactant was removed by filtration and deionized water washing, and the pure Co nanoparticles were obtained and stored at 4°C for reserve.

**Synthesis of Fe<sub>3</sub>O<sub>4</sub> nanoparticles.** First, FeCl<sub>3</sub>·6H<sub>2</sub>O and FeCl<sub>2</sub>·4H<sub>2</sub>O were dissolved in 15 mL deionized water in a molar ratio of 1:1, and 0.3 g PEG-2000 was added to modify Fe<sub>3</sub>O<sub>4</sub> nanoparticles to make the nanoparticles more hydrophilic. Then,

the above iron salt solution was placed in ultrasonic cleaning apparatus, and the ultrasonic temperature was set at 60°C with mechanical agitation, and 1 mol/mL NaOH solution was slowly added to generate magnetic Fe<sub>3</sub>O<sub>4</sub> nanoparticles. The reaction was complete until the solution turned pure black, then the black suspension was placed in an 80°C water bath and stirred for 15 min. The black suspension was placed on the magnet for separation, the supernatant was dumped to precipitate Fe<sub>3</sub>O<sub>4</sub> particles, and the deionized water and anhydrous ethanol were used to wash the particles alternately for three times. Dry the end product thoroughly in a 70°C oven and store it in a dryer for use.

**Synthesis of PTX/Co-Lips.** First, soybean lecithin, cholesterol and paclitaxel (PTX) with a mass ratio of 50:5:1 were dissolved in anhydrous ethanol and placed on a rotary evaporator for 2 h under reduced pressure to form a uniform lipid film on the round bottom flask. Then, 200 mL of Co nanoparticles, 10 μL Twin-80 and 9800 μL phosphate buffer (PBS, pH = 6.5) were added to the round bottom flask and rotated for hydration. Finally, uniform liposomes were obtained from the liposome suspension by ultrasound 10 min. Liposome solutions are removed from unpackaged reagents by means of a glucan gel (Sephadex G-150) and stored at 4°C for use.

**Synthesis of PTX/Co-Lips@Fe<sub>3</sub>O<sub>4</sub> nanoparticles.** Fe<sub>3</sub>O<sub>4</sub> solution (1 mg/mL) was dripped into the prepared PTX/Co-Lips (1:2 volume ratio), stirred gently for 2 h, and then centrifuged and purified to remove the unmodified Fe<sub>3</sub>O<sub>4</sub> based on the particle size. Finally, Fe<sub>3</sub>O<sub>4</sub> modified nanoparticles PTX/Co-Lip@Fe<sub>3</sub>O<sub>4</sub> were obtained.

**•OH generation.** 1.0 mM GSH, 8 mM H<sub>2</sub>O<sub>2</sub> and 1 mL PTX/Co-Lips@Fe<sub>3</sub>O<sub>4</sub> were added to 25 mM NaHCO<sub>3</sub> buffer solution for 30 min at 37 °C. After centrifugation, add 10 μg/mL methyl blue (MB) to the supernatant and determine the absorbance of MB at 665 nm.

**PTX release.** 1 mL of the sample was put into the dialysis bag, and then the dialysis bag was placed into a 200 mL dialysate beaker with or without GSH and H<sub>2</sub>O<sub>2</sub>, and continuously stirred under a 37 °C water bath shaker. The sample was taken out of the beaker at a predetermined time interval, 2 mL of methanol was added to demulsification overnight, and the sample was centrifuged at 1000 RPS for 30 min. Finally, the

absorbance of the sample was determined with a spectrophotometer. The standard curve was calibrated with a known concentration of PTX solution and the drug content was analyzed.

**Magnetic field response.** In order to observe the response of the prepared target nanoliposomes to the magnetic field, the target sample was added into the small glass bottle in this experiment. After 10 min of response, the concentration of PTX/Co-Lip@Fe<sub>3</sub>O<sub>4</sub> nanoparticles towards the direction of the magnetic field (D10 × 5 mm, N35) was observed to evaluate its targeting performance.

**Cellular uptake and cytotoxicity.** The antitumor effect of all formulations was studied by HeLa cells using the MTT assay. The cells were cultured in Dulbecco's Modified Eagle's Medium (DMEM) containing 10% fetal bovine serum and 1% penicillin/streptomycin at 37 °C containing 5% CO<sub>2</sub>. HeLa cells were cultured in a 6-well plate for 24 hours, the samples were added to the plate. The cells were then washed with cold PBS three times and fixed with 4% paraformaldehyde for 10 min. Finally, the cells were observed under an inverted fluorescence microscope.

**Antitumor effect and MRI *in vivo*.** Kunming mice (5~7 weeks old, female) were inoculated subcutaneously with U14 cells in the right flank of mice. When the tumor size reached about 100 mm<sup>3</sup>, the mice were injected 200 μL of all the samples for 12 days. The tracking effect of PTX/Co-Lips@Fe<sub>3</sub>O<sub>4</sub> was assessed using MRI images of tumor-bearing mice. Mice with U14 tumors were intravenously injected with 200 μL PTX/Co-Lips@Fe<sub>3</sub>O<sub>4</sub> samples, scanned with an MRI system, and then obtained MRI images at different time points. *In vivo* MRI was performed at the Siemens 3.0t MR Leonardo 3682 workstation. Experimental parameters of T<sub>2</sub> rapid recovery of spin echo sequence are set as follows: repeat time (TR) = 1800 ms, echo time (TE) = 110 ms, slice thickness = 2.0 mm, resolution = 1.5×1.0×2.0 mm, field of view (FOV) = 65×65 mm<sup>2</sup>. After the experiment, the mice were sacrificed by breaking spinal marrow under ether anesthesia, the main organs (heart, liver, spleen, lung, and kidney) and tumor tissues were excised for H&E staining. All experiments involving animals were performed in accordance with the statute of Experimental Animal Ethics Committee of Yanshan University.

| "All in One" Strategy                                                                                                                                                                                                                            |                                                                                                                                                                                                                                                                                                                                  |
|--------------------------------------------------------------------------------------------------------------------------------------------------------------------------------------------------------------------------------------------------|----------------------------------------------------------------------------------------------------------------------------------------------------------------------------------------------------------------------------------------------------------------------------------------------------------------------------------|
| <p style="text-align: center;"><b>Theranostics in One System</b></p> <ol style="list-style-type: none"> <li>1. Tumor Targeting (Magnetic field)</li> <li>2. Ferrotherapy Fe (II)-based Fenton reaction</li> <li>3. Chemotherapy (PTX)</li> </ol> | <p style="text-align: center;"><b>Enhancements of Ferrotherapy in One System</b></p> <ol style="list-style-type: none"> <li>1. Depletion of GSH by Fe<sub>3</sub>O<sub>4</sub></li> <li>2. Fe (III) to Fe (II) by Co-involved Redox</li> <li>3. Generation of Co (II) by Co-involved Redox</li> <li>4. Magnetic field</li> </ol> |

Fig. S1 Schematic illustration of "All in one" strategy in this work.

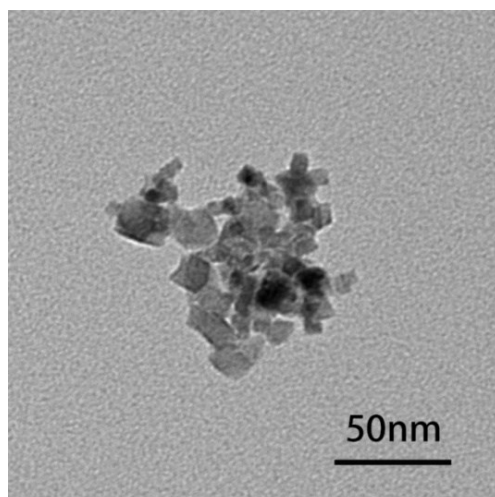

Fig. S2 TEM image of Fe<sub>3</sub>O<sub>4</sub> nanoparticles.

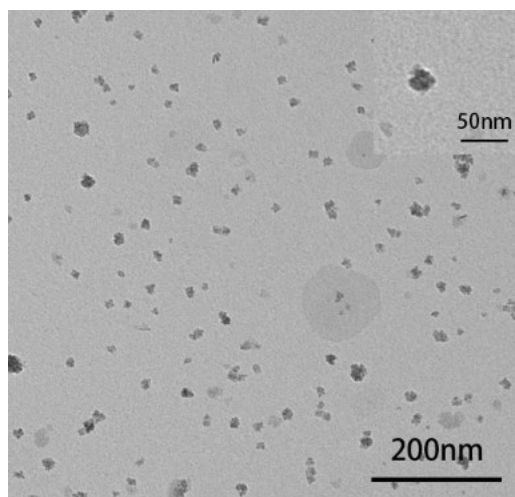

Fig. S3 TEM image of Co nanoparticles.

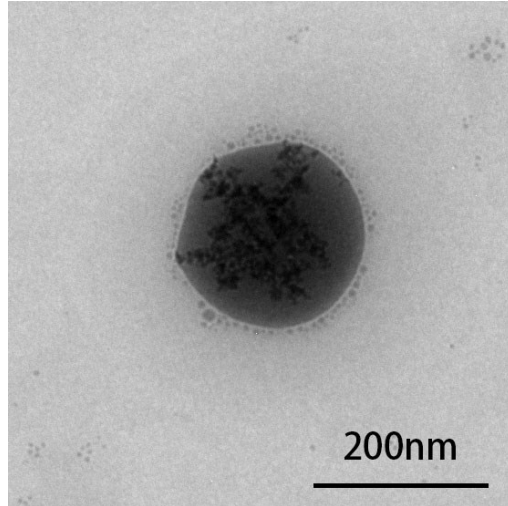

Fig. S4 TEM image of Lips@Fe<sub>3</sub>O<sub>4</sub>.

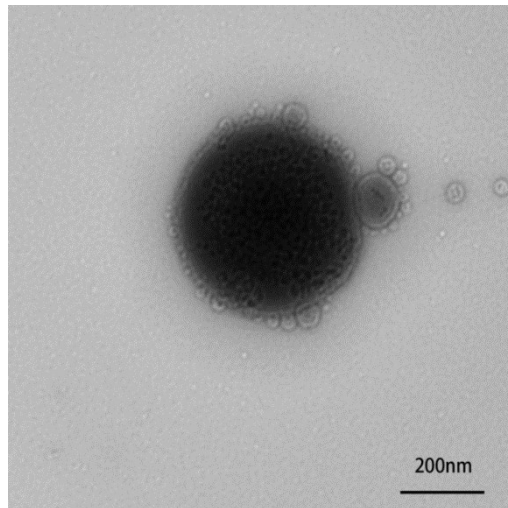

Fig. S5 TEM image of Co-Lips.

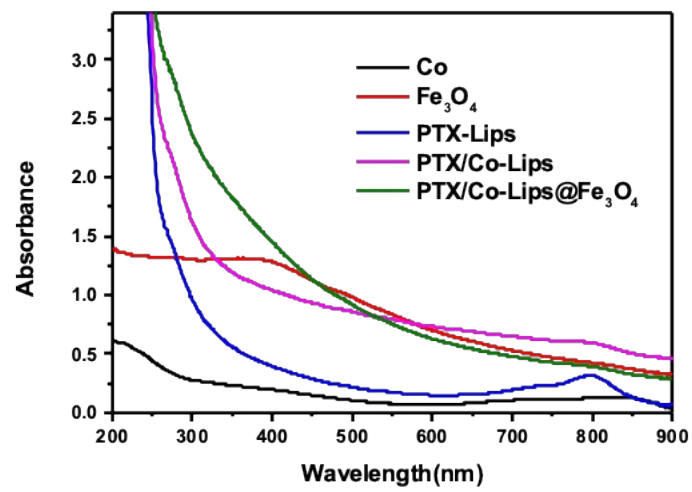

Fig. S6 UV-Vis spectrum of all tested groups (Co, Fe<sub>3</sub>O<sub>4</sub>, PTX-Lips, PTX/Co-Lips and PTX/Co-Lips@Fe<sub>3</sub>O<sub>4</sub>).

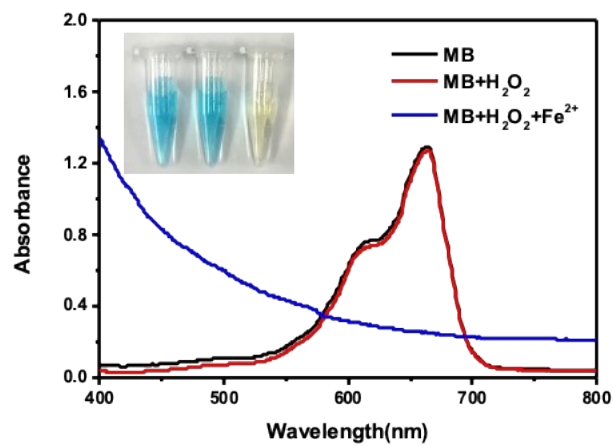

Fig. S7 UV-Vis spectrum of MB with H<sub>2</sub>O<sub>2</sub> and Fe (II).

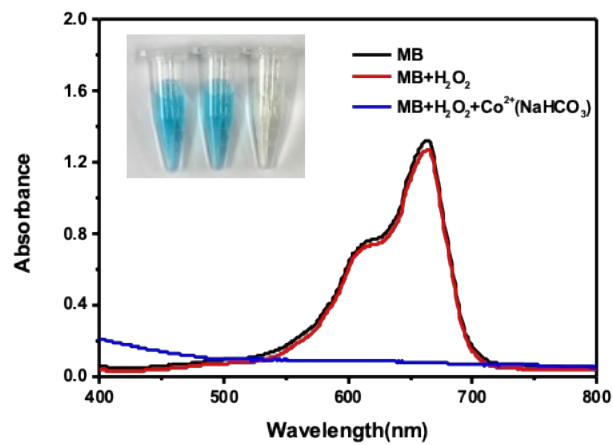

Fig. S8 UV-Vis spectrum of MB with H<sub>2</sub>O<sub>2</sub> and Co (II).

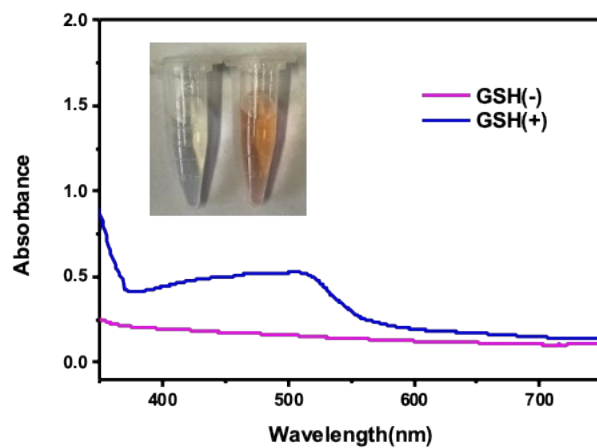

Fig. S9 UV-Vis spectrum of O-phenanthroline + Lips@Fe<sub>3</sub>O<sub>4</sub> treated with GSH (+, -).

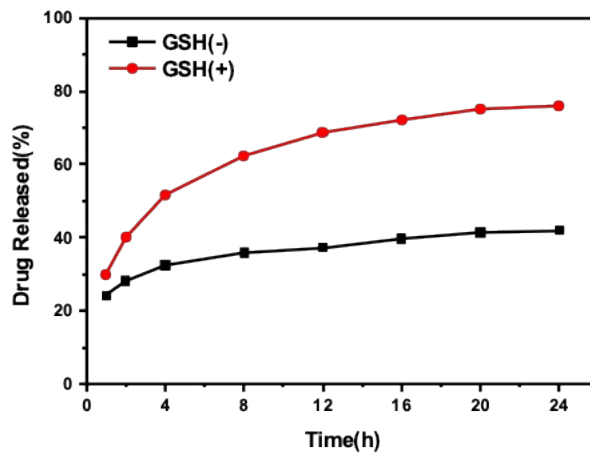

Fig. S10 Drug release profiles of PTX/Co-Lips@Fe<sub>3</sub>O<sub>4</sub> with/without GSH.

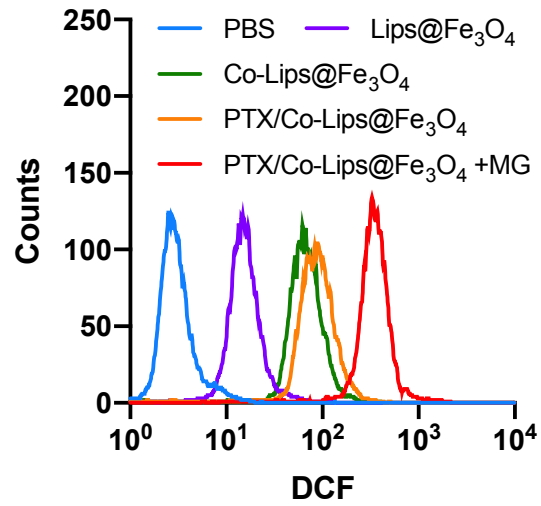

Fig. S11 Flow cytometry analysis of DCF-positive HeLa cells treated with PBS, Lips@Fe<sub>3</sub>O<sub>4</sub>, Co-Lips@Fe<sub>3</sub>O<sub>4</sub> and PTX/Co-Lips@Fe<sub>3</sub>O<sub>4</sub> with and without MG.



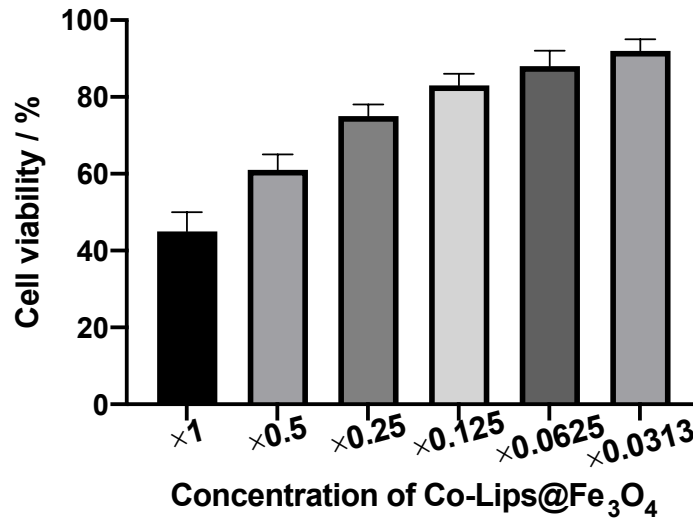

Fig. S12 Cell viability of HeLa cells treated with Co-Lips@Fe<sub>3</sub>O<sub>4</sub> with different concentration.

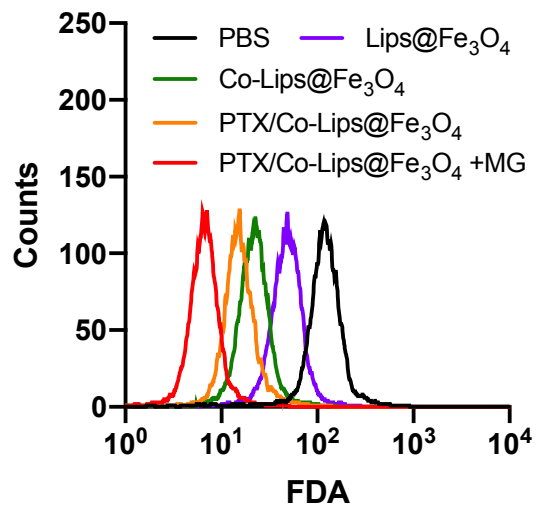

Fig. S13 Flow cytometry analysis of PDA-positive HeLa cells treated with PBS, Lips@Fe<sub>3</sub>O<sub>4</sub>, Co-Lips@Fe<sub>3</sub>O<sub>4</sub> and PTX/Co-Lips@Fe<sub>3</sub>O<sub>4</sub> with and without MG.

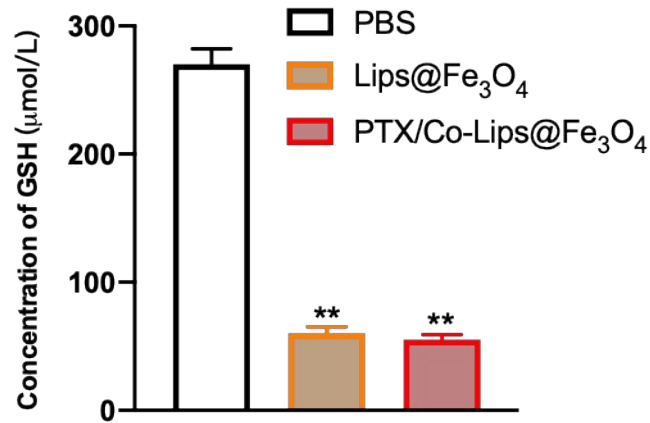

Fig. S14 Concentration of intracellular GSH of PBS, Lips@Fe<sub>3</sub>O<sub>4</sub> and PTX/Co-Lips@Fe<sub>3</sub>O<sub>4</sub> (\*\*P<0.01 compared with PBS group).

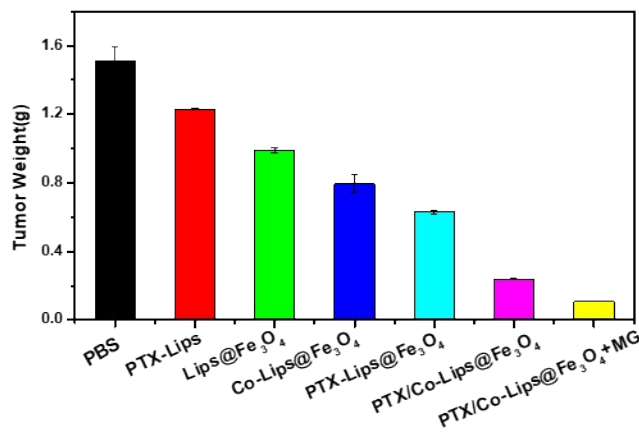

Fig. S15 Tumor weight of all tested groups (PBS, PTX-Lips, Lips@Fe<sub>3</sub>O<sub>4</sub>, Co-Lips@Fe<sub>3</sub>O<sub>4</sub>, PTX-Lips@Fe<sub>3</sub>O<sub>4</sub>, PTX/Co-Lips@Fe<sub>3</sub>O<sub>4</sub> and PTX/Co-Lips@Fe<sub>3</sub>O<sub>4</sub> with MG).
